# Supplementary material for: Serum Sorbitol Dehydrogenase as a Novel Prognostic Factor for Hepatocellular Carcinoma after Surgical Resection
Source: MDPI journal article supplement (doi:10.3390/cancers13236143), 2021-12-06
Supplement: s1 [file s1]

# Supplementary Material: Serum Sorbitol Dehydrogenase as a Novel Prognostic Factor for Hepatocellular Carcinoma after Surgical Resection

Dongsub Jeon, Won-Mook Choi, Jin-Sun Kim, Yusun Jung, Su-Yeon Lee, Haeng Ran Seo and Kang Mo Kim

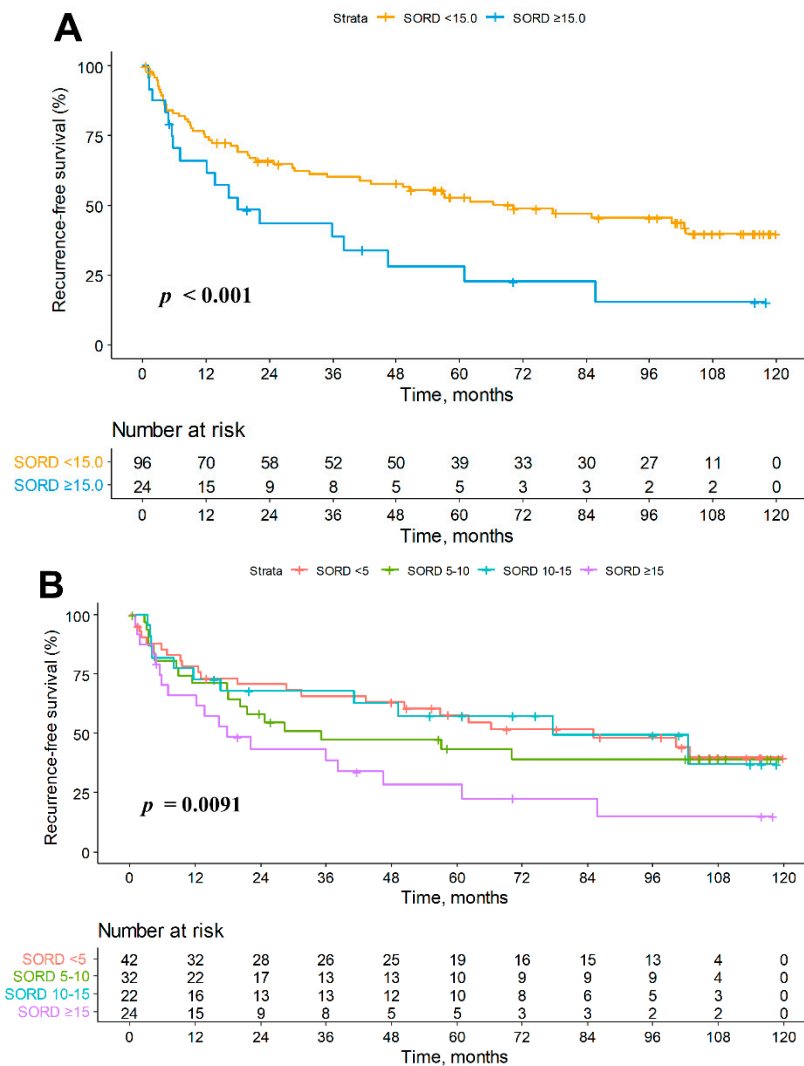

**Figure S1.** Kaplan–Meier plot for recurrence-free survival including BCLC stage B and C. **(A)** Patients stratified into two groups by baseline serum SORD level (<15 ng/mL and ≥15 ng/mL). **(B)** Patients stratified into four groups by baseline serum SORD level (<5 ng/mL, 5–10 ng/mL, 10–15 ng/mL, and ≥15 ng/mL).

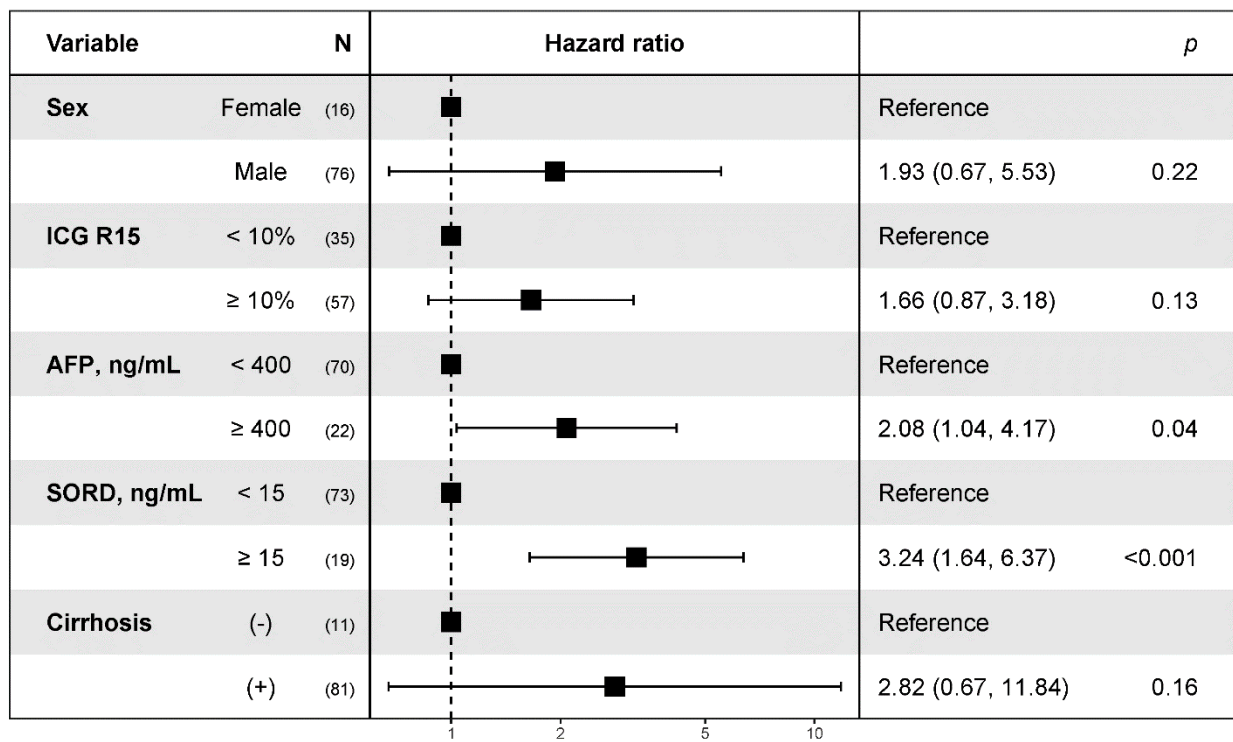

**Figure S2.** Forest plot of multivariable analysis for recurrence-free survival.

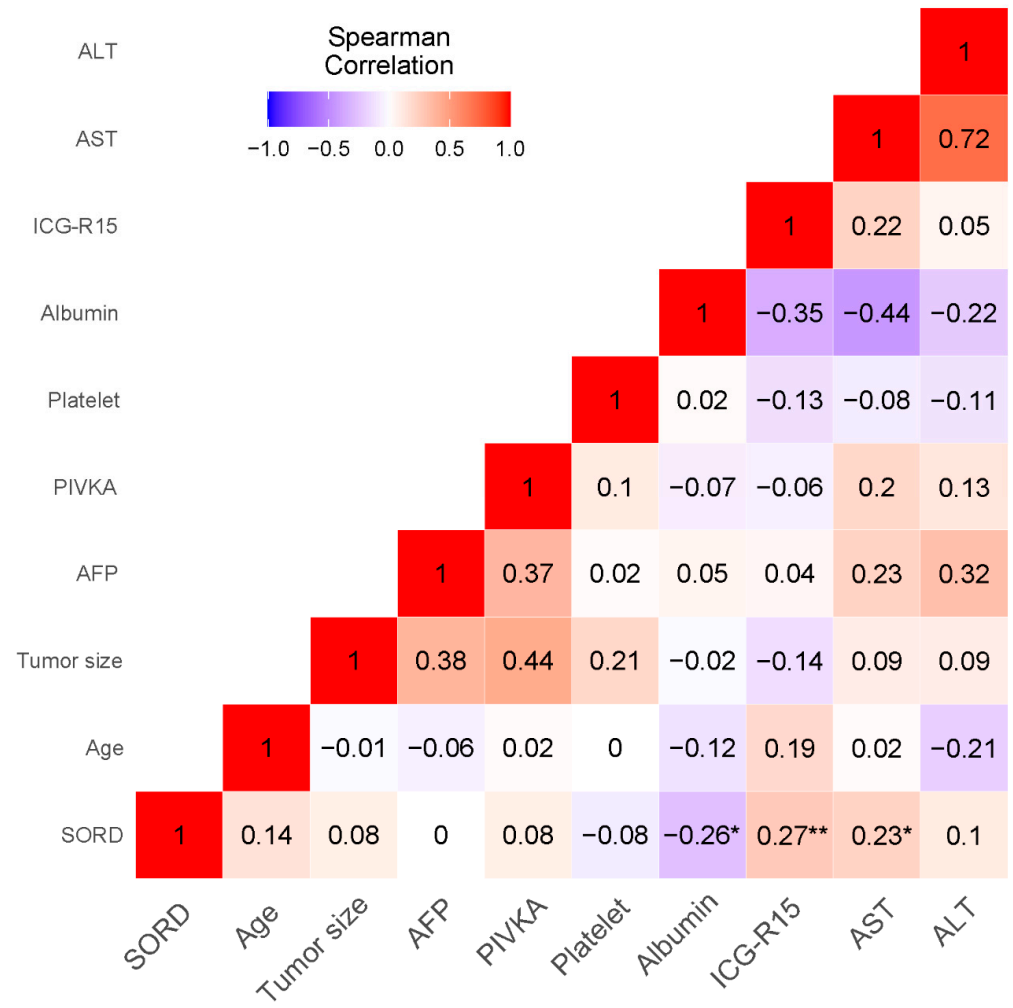

**Figure S3.** Heatmap of Spearman's correlation coefficients among variables. (\*, \*\* indicate  $p < 0.05$  and  $p < 0.01$ , respectively)

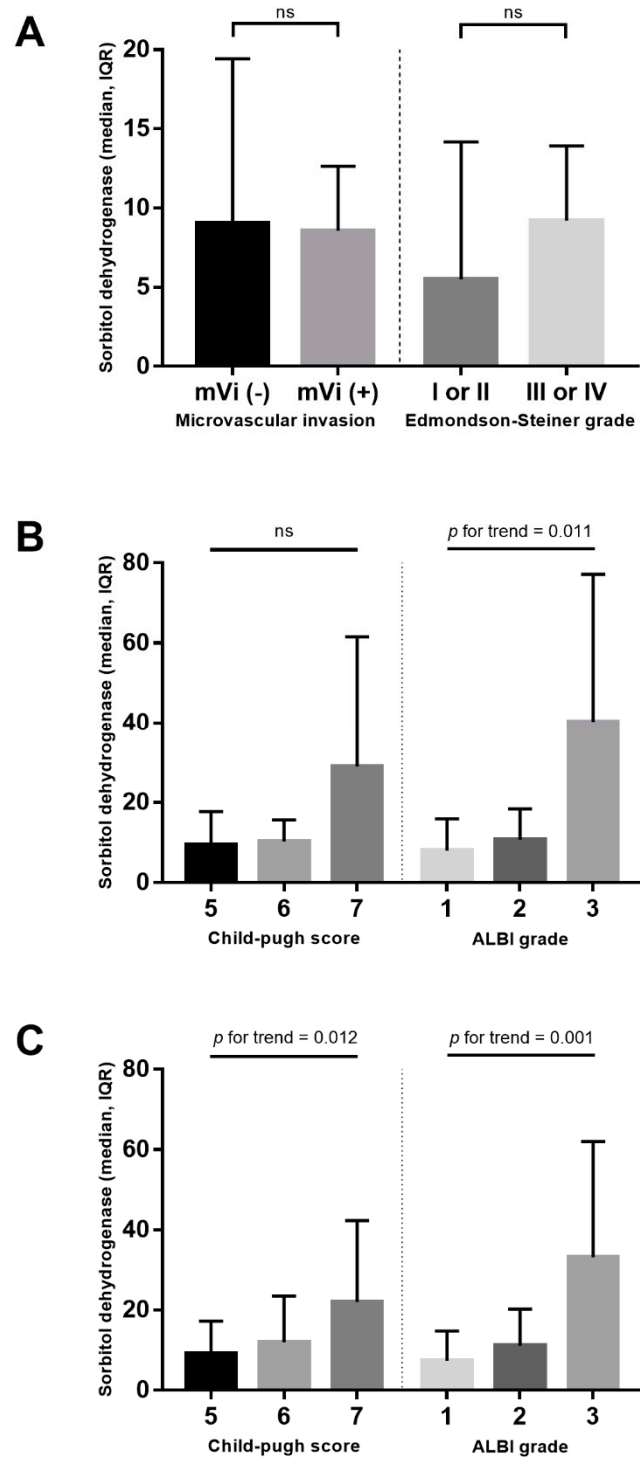

**Figure S4.** Baseline serum SORD levels stratified by tumor histology and underlying liver function. **(A)** Serum SORD levels stratified by the presence of microvascular invasion or Edmondson-Steiner grade (I or II vs. III or IV). **(B)** Serum SORD levels stratified by Child-Pugh score and ALBI grade in the primary analysis of subjects with BCLC 0 or A stage. **(C)** Serum SORD levels stratified by Child-Pugh score and ALBI grade in an extended analysis including subjects with all BCLC stages. (ns indicate  $p > 0.05$ )

**Table S1.** Baseline characteristics stratified by postoperative tumor recurrence.

| Characteristics                              | No Recurrence<br>[N = 49] | Recurrence<br>[N = 43] | P-Value |
|----------------------------------------------|---------------------------|------------------------|---------|
| Age, median [IQR], y                         | 56.0 [48.0, 61.0]         | 54.0 [48.5, 60.0]      | 0.69    |
| Male, <i>n</i> (%)                           | 37 (75.5)                 | 39 (90.7)              | 0.10    |
| Etiology, <i>n</i> (%)                       |                           |                        | 0.53    |
| Hepatitis B                                  | 42 (85.7)                 | 40 (93.0)              |         |
| Hepatitis C                                  | 2 (4.1)                   | 1 (2.3)                |         |
| Others                                       | 5 (10.2)                  | 2 (4.7)                |         |
| Diabetes, <i>n</i> (%)                       | 11 (22.4)                 | 8 (18.6)               | 0.84    |
| Previous TACE, <i>n</i> (%)                  | 5 (10.2)                  | 10 (23.3)              | 0.16    |
| SORD, median [IQR], ng/mL                    | 7.1 [3.6, 11.6]           | 10.0 [4.6, 16.9]       | 0.040   |
| AFP, ng/mL                                   | 22.8 [4.4, 253.0]         | 51.4 [9.3, 1009.1]     | 0.16    |
| <400, <i>n</i> (%)                           | 39 (79.6)                 | 31 (72.1)              | 0.55    |
| ≥400, <i>n</i> (%)                           | 10 (20.4)                 | 12 (27.9)              | 0.55    |
| PIVKA-II, mAU/mL                             | 41.0 [22.0, 148.0]        | 51.0 [21.0, 632.5]     | 0.49    |
| <40, <i>n</i> (%)                            | 24 (49.0)                 | 19 (44.2)              | 0.80    |
| ≥40, <i>n</i> (%)                            | 25 (51.0)                 | 24 (55.8)              | 0.80    |
| AST, median [IQR], IU/L                      | 29.0 [26.0, 40.0]         | 35.0 [28.0, 53.0]      | 0.09    |
| ALT, median [IQR], IU/L                      | 29.0 [22.0, 44.0]         | 35.0 [27.5, 45.5]      | 0.19    |
| Platelet, median [IQR], ×10 <sup>3</sup> /μL | 131.0 [113.0, 166.0]      | 134.0 [107.5, 176.0]   | 0.81    |
| Albumin, median [IQR], g/dL                  | 3.9 [3.6, 4.2]            | 3.8 [3.6, 4.2]         | 0.96    |
| Bilirubin, median [IQR], IU/L                | 0.8 [0.7, 1.0]            | 0.9 [0.7, 1.2]         | 0.74    |
| Creatinine, median [IQR], mg/dL              | 0.8 [0.7, 0.9]            | 0.8 [0.7, 0.9]         | 0.56    |
| Prothrombin time, median [IQR],<br>INR       | 1.06 [1.01, 1.11]         | 1.06 [1.01, 1.13]      | 0.96    |
| Child-Pugh score, <i>n</i> (%)               |                           |                        | 0.88    |
| 5                                            | 42 (85.7)                 | 38 (88.4)              |         |
| 6                                            | 5 (10.2)                  | 4 (9.3)                |         |
| 7                                            | 2 (4.1)                   | 1 (2.3)                |         |
| ALBI grade, <i>n</i> (%)                     |                           |                        | 0.95    |
| 1                                            | 21 (42.9)                 | 17 (39.5)              |         |
| 2                                            | 27 (55.1)                 | 25 (58.1)              |         |
| 3                                            | 1 (2.0)                   | 1 (2.3)                |         |
| ICG-R15, median [IQR], %                     | 11.0 [7.5, 13.1]          | 11.6 [8.8, 17.5]       | 0.10    |
| Resection type*, <i>n</i> (%)                |                           |                        | 0.18    |
| Major                                        | 8 (16.3)                  | 10 (23.3)              |         |
| Minor                                        | 41 (83.7)                 | 33 (76.7)              |         |
| Tumor size, median [IQR], cm                 | 3.0 [2.2, 4.2]            | 3.0 [2.4, 4.2]         | 0.95    |
| Microscopic vascular invasion, <i>n</i> (%)  | 11 (22.4)                 | 13 (30.2)              | 0.54    |
| Edmondson grade, <i>n</i> (%)                |                           |                        | >0.99   |
| I or II                                      | 10 (20.4)                 | 9 (20.9)               |         |
| III or IV                                    | 39 (79.6)                 | 34 (79.1)              |         |

Continuous variables with non-normal distribution are reported as median (interquartile range [IQR]), and categorical variables are reported as number with percentage (%). \* Major resection was defined as resection of four or more liver segments, with the remaining procedures considered to be minor resection. AFP,  $\alpha$ -fetoprotein; ALBI grade, albumin-bilirubin grade; AST, aspartate aminotransferase; ALT, alanine aminotransferase; ICG-R15, indocyanine green retention rate at 15 minutes; INR, international normalized ratio; IU, international unit; IQR, interquartile range; PIVKA-II, protein induced by vitamin K absence or antagonist-II; SORD, sorbitol dehydrogenase; TACE, transcatheter arterial chemoembolization.
